# Supplementary material
Source: publisher site journal article supplement (https://www.dovepress.com/article/supplementary_file/602835/Supplementary%20table%20and%20figure.docx)

Supplementary table 1: Compartment model selection

| Model | OFV | PK Parameter | Estimate | RSE (%) | Omega (CV%) |
| --- | --- | --- | --- | --- | --- |
| 1 | 543.95 | V | 11.95 | 36.5 | 0.12 (12.25%) |
| CL | 4.89 | 19.0 | 0.45 (47.15%) |
| 2 | 533.77 | V1 | 0.01 | 1.54e+5 | 1.77 (471.09%) |
| V2 | 4.95 | 21.7 | 0.20 (19.98%) |
| CL | 3.22 | 14.1 | 0.44 (45.90%) |
| Q | 6.36 | 103 | 0.70 (79.70%) |

CL: clearance, CV: coefficient of variation, OFV: objective function value, PK: pharmacokinetic, RSE: relative standard error, V: volume of distribution

Supplementary table 2: Covariate Analysis

| Step | Run Scenario | ΔOFV | nParm |
| --- | --- | --- | --- |
| 1, forward inclusion |  |  |  |
| CG-CL | -6.48 | 2 |
| CKD2012-CL | -10.50 | 2 |
| CKD2021-CL | -12.13 | 2 |
| WT-CL | -0.92 | 2 |
| Age-CL | -0.27 | 2 |
| BMI-CL | -0.40 | 2 |
| WT-V | -1.72 | 2 |
| Age-V | -0.31 | 2 |
| BMI-V | -2.16 | 2 |
| 2, forward inclusion |  |  |  |
| WT, CKD2021-CL | +1.17 | 3 |
| Age, CKD2021-CL | -0.45 | 3 |
| BMI, CKD2021-CL | -0.16 | 3 |
| WT-V, CKD2021-CL | -2.29 | 3 |
| Age-V, CKD2021-CL | -3.29 | 3 |
| BMI-V, CKD2021-CL | -0.65 | 3 |
| 3, backward elimination |  |  |  |
| Base | +12.40 | 2 |

Note: Allometric scaling was applied for body weight with fixed exponents of 0.75 on CL and 1.0 on V, following standard allometric theory. Covariate selection based on change in OFV at least 3.84 (p < 0.05) during forward inclusion and an increase of more than 6.63 (p < 0.01) during backward elimination.

BMI: body mass index; CG: Cockcroft-Gault formula; CKD: Chronic Kidney Disease Epidemiology Collaboration formula; CL: clearance; OFV: objective function value; V: volume of distribution; WT: body weight.

Supplementary table 3: Parameter Uncertainty Propagation Analysis

fu=0.7, replicates = 100; value shown in PTA% (95%CI)

| 2250mgQ12H 1IF | | MIC (mcg/mL) | | | Trough ≥361 |
| --- | --- | --- | --- | --- | --- |
| ≥4 | ≥8 | ≥16 |
| eGFR | 20 | 100 (95.2 – 100) | 100 (82.5 – 100) | 99.8 (58.1 – 100) | 0.0 (0.0 – 1.3) |
| 40 | 98.6 (68.0 – 100) | 93.3 (40.7 – 99.9) | 76.7 (14.0 – 99.5) | 0.0 (0.0 – 0.0) |
| 60 | 79.8 (33.6 – 97.1) | 56.6 (13.2 – 89.3) | 28.7 (2.2 – 67.1) | 0.0 (0.0 – 0.0) |
| 100 | 22.7 (4.7 – 39.2) | 8.6 (0.2 – 20.3) | 1.6 (0.0 – 7.0) | 0.0 (0.0 – 0.0) |
| 130 | 4.5 (0.2 – 18.7) | 1.3 (0.0 – 7.5) | 0.1 (0.0 – 1.6) | 0.0 (0.0 – 0.0) |
| 2250mgQ12H 4IF | | MIC (mcg/mL) | | | Trough ≥361 |
| ≥4 | ≥8 | ≥16 |
| eGFR | 20 | 100 (98.8 – 100) | 100 (93.4 – 100) | 100 (73.0 – 100) | 0.0 (0.0 – 2.0) |
| 40 | 99.6 (86.4 – 100) | 97.4 (62.4 – 100) | 87.0 (27.4 – 99.7) | 0.0 (0.0 – 0.0) |
| 60 | 90.4 (56.9 – 98.9) | 73.3 (27.9 – 94.7) | 41.8 (6.2 – 81.1) | 0.0 (0.0 – 0.0) |
| 100 | 36.4 (13.7 – 52.6) | 17.2 (2.8 – 31.3) | 3.6 (0.0 – 11.8) | 0.0 (0.0 – 0.0) |
| 130 | 10.9 (1.8 – 29.5) | 3.3 (0.1 – 14.2) | 0.5 (0.0 – 3.4) | 0.0 (0.0 – 0.0) |
| 2250mgQ8H 1IF | | MIC (mcg/mL) | | | Trough ≥361 |
| ≥4 | ≥8 | ≥16 |
| eGFR | 20 | 100 (99.9 – 100) | 100 (99.2 – 100) | 100 (93.9 – 100) | 0.0 (0.0 – 20.9) |
| 40 | 100 (96.1 – 100) | 99.8 (89.7 – 100) | 97.7 (64.6 – 100) | 0.0 (0.0 – 0.0) |
| 60 | 97.9 (83.9 – 100) | 92.3 (66.3 – 99.2) | 74.1 (33.8 – 95.3) | 0.0 (0.0 – 0.0) |
| 100 | 67.5 (45.3 – 78.7) | 41.5 (21.2 – 57.4) | 17.4 (4.1 – 30.9) | 0.0 (0.0 – 0.0) |
| 130 | 32.9 (14.0 – 55.8) | 14.9 (3.1 – 32.9) | 3.7 (0.1 – 14.2) | 0.0 (0.0 – 0.0) |
| 2250mgQ8H 4IF | | MIC (mcg/mL) | | | Trough ≥361 |
| ≥4 | ≥8 | ≥16 |
| eGFR | 20 | 100 (100 – 100) | 100 (99.9 – 100) | 100 (99.1 – 100) | 0.0 (0.0 – 27.4) |
| 40 | 100 (99.5 – 100) | 100 (97.6 – 100) | 99.7 (88.5 – 100) | 0.0 (0.0 – 0.0) |
| 60 | 99.8 (97.0 – 100) | 98.7 (88.8 – 100) | 91.5 (66.5 – 99.2) | 0.0 (0.0 – 0.0) |
| 100 | 90 (78.9 – 97.5) | 71.9 (55.6 – 85.0) | 38.8 (21.7 – 52.1) | 0.0 (0.0 – 0.0) |
| 130 | 65.7 (50.4 – 88.1) | 37.8 (21.1 – 59.2) | 13.6 (3.1 – 27.9) | 0.0 (0.0 – 0.0) |
| 2250mgQ6H 1IF | | MIC (mcg/mL) | |  | Trough ≥361 |
| ≥4 | ≥8 | ≥16 |
| eGFR | 20 | 100 (100 – 100) | 100 (100 – 100) | 100 (99.4 – 100) | 0.0 (0.0 – 54.1) |
| 40 | 100 (99.6 – 100) | 100 (98.2 – 100) | 99.8 (91.8 – 100) | 0.0 (0.0 – 0.0) |
| 60 | 99.9 (97.4 – 100) | 99.0 (91.1 – 100) | 94.1 (72.9 – 99.4) | 0.0 (0.0 – 0.0) |
| 100 | 91.6 (80.9 – 98.0) | 76.6 (60.5 – 88.6) | 47.4 (29.2 – 60.0) | 0.0 (0.0 – 0.0) |
| 130 | 68.9 (53.6 – 89.8) | 43.1 (26.6 – 65.0) | 17.6 (5.9 – 35.7) | 0.0 (0.0 – 0.0) |
| 2250mgQ6H 4IF | | MIC (mcg/mL) | | | Trough ≥361 |
| ≥4 | ≥8 | ≥16 |
| eGFR | 20 | 100 (100 – 100) | 100 (100 – 100) | 100 (100 – 100) | 0.0 (0.1 – 68.3) |
| 40 | 100 (100 – 100) | 100 (99.9 – 100) | 100 (99.3 – 100) | 0.0 (0.0 – 0.3) |
| 60 | 100 (99.9 – 100) | 100 (99.4 – 100) | 99.6 (96.0 – 100) | 0.0 (0.0 – 0.0) |
| 100 | 99.6 (98.4 – 100) | 97.3 (93.3 – 99.9) | 84.9 (73.9 – 97.0) | 0.0 (0.0 – 0.0) |
| 130 | 96.9 (90.2 – 100) | 86.6 (72.0 – 99.1) | 57.5 (35.4 – 84.8) | 0.0 (0.0 – 0.0) |
| 3375mgQ6H 1IF | | MIC (mcg/mL) | | | Trough ≥361 |
| ≥4 | ≥8 | ≥16 |
| eGFR | 20 | 100 (100 – 100) | 100 (100 – 100) | 100 (99.9 – 100) | 19.9 (0.2 – 99.2) |
| 40 | 100 (99.8 – 100) | 100 (99.2 – 100) | 100 (96.4 – 100) | 0.3 (0.0 – 12.5) |
| 60 | 100 (98.6 – 100) | 99.7 (95.8 – 100) | 97.7 (85.1 – 100) | 0.0 (0.0 – 0.3) |
| 100 | 95.5 (87.5 – 99.6) | 87.3 (73.5 – 95.7) | 65.7 (47.6 – 79.5) | 0.0 (0.0 – 0.0) |
| 130 | 79.5 (65.5 – 95.4) | 58.4 (43.6 – 83.3) | 31.8 (15.5 – 52.2) | 0.0 (0.0 – 0.0) |
| 3375mgQ6H 4IF | | MIC (mcg/mL) | | | Trough ≥361 |
| ≥4 | ≥8 | ≥16 |
| eGFR | 20 | 100 (100 – 100) | 100 (100 – 100) | 100 (100 – 100) | 31.3 (0.6 – 99.7) |
| 40 | 100 (100 – 100) | 100 (100 – 100) | 100 (99.8 – 100) | 0.5 (0.0 – 21.1) |
| 60 | 100 (100 – 100) | 100 (99.9 – 100) | 99.9 (98.6 – 100) | 0.0 (0.0 – 0.7) |
| 100 | 99.9 (99.2 – 100) | 99.1 (97.1 – 100) | 94.4 (87.5 – 99.8) | 0.0 (0.0 – 0.0) |
| 130 | 98.8 (95.1 – 100) | 94.4 (84.4 – 99.9) | 77.9 (59.3 – 96.3) | 0.0 (0.0 – 0.0) |
| 4500mgQ6H 1IF | | MIC (mcg/mL) | | | Trough ≥361 |
| ≥4 | ≥8 | ≥16 |
| eGFR | 20 | 100 (100 – 100) | 100 (100 – 100) | 100 (100 – 100) | 67.7 (1.8 – 100) |
| 40 | 100 (99.9 – 100) | 100 (99.6 – 100) | 100 (98.2 – 100) | 3.5 (0.0 – 51.6) |
| 60 | 100 (99.2 – 100) | 99.9 (97.4 – 100) | 99.0 (91.1 – 100) | 0.1 (0.0 – 2.3) |
| 100 | 97.1 (91.2 – 99.8) | 91.5 (80.9 – 98.0) | 76.6 (60.5 – 88.6) | 0.0 (0.0 – 0.0) |
| 130 | 84.7 (72.1 – 97.4) | 68.9 (53.6 – 89.8) | 43.1 (26.6 – 65.0) | 0.0 (0.0 – 0.0) |
| 4500mgQ6H 4IF | | MIC (mcg/mL) | | | Trough ≥361 |
| ≥4 | ≥8 | ≥16 |
| eGFR | 20 | 100 (100 – 100) | 100 (100 – 100) | 100 (100 – 100) | 78.1 (6.5 – 100) |
| 40 | 100 (100 – 100) | 100 (100 – 100) | 100 (99.9 – 100) | 6.9 (0.0 – 64.0) |
| 60 | 100 (100 – 100) | 100 (99.9 – 100) | 100 (99.4 – 100) | 0.4 (0.0 – 4.8) |
| 100 | 100 (99.6 – 100) | 99.6 (98.4 – 100) | 97.3 (93.3 – 99.9) | 0.0 (0.0 – 0.0) |
| 130 | 99.4 (96.9 – 100) | 96.9 (90.2 – 100) | 86.6 (72.0 – 99.1) | 0.0 (0.0 – 0.0) |

Supplementary Figure 1: Visual predictive check for the final population pharmacokinetic model

Outliers are highlighted using red markers and shaded regions, while the red vertical lines denote the bin boundaries


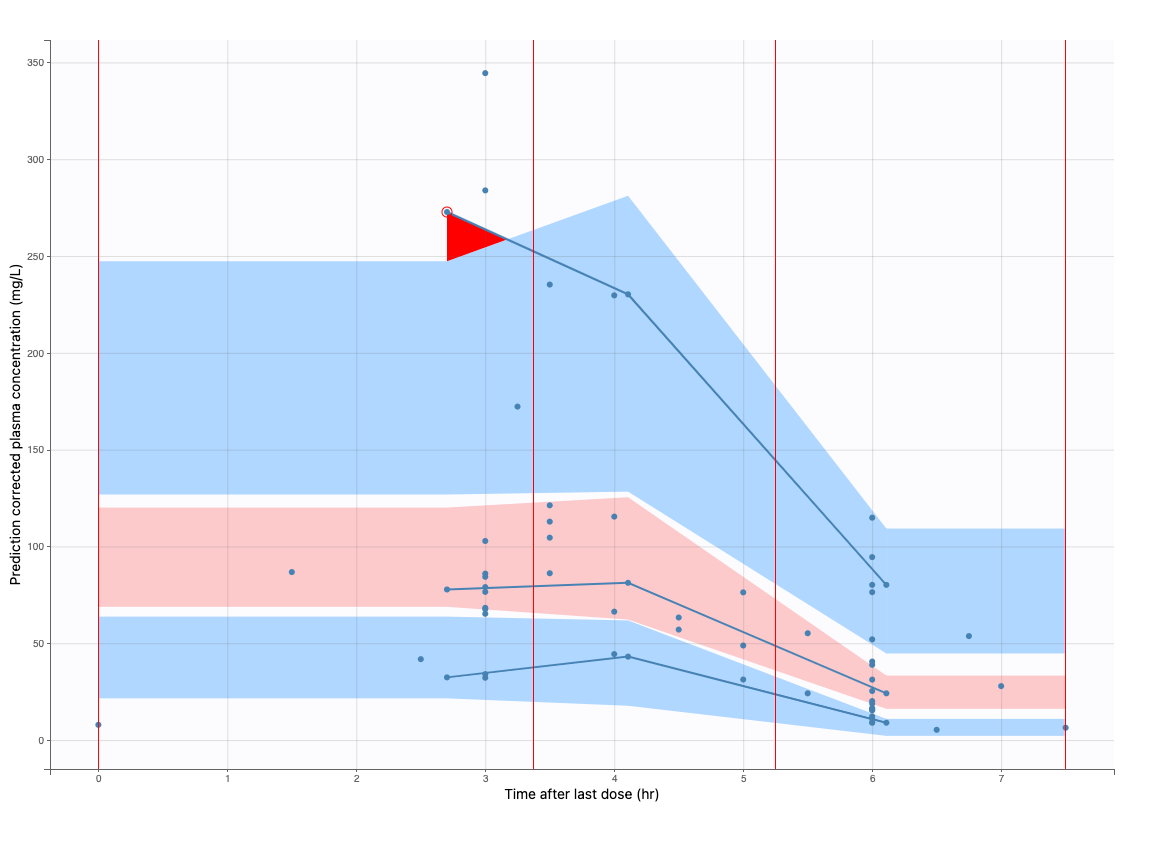


Supplementary Figure 2: Probability of target attainment under different dosing regimens and renal function

(a) 2250mg q12h IF 1hr (b) 2250mg q12h IF 4hr


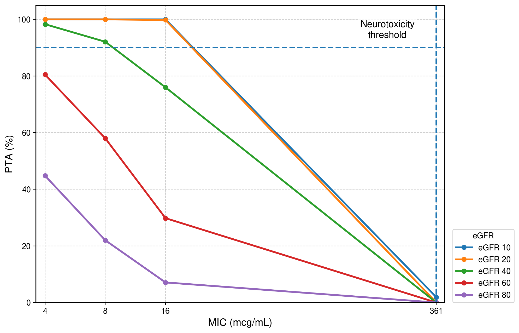

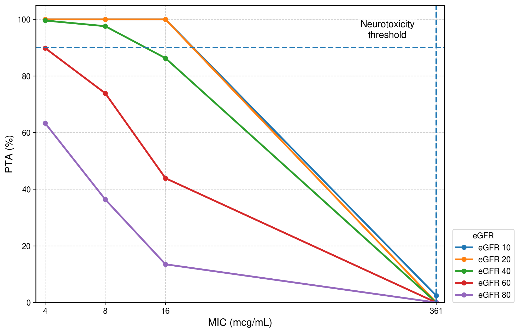


(c) 2250mg q8h IF 1hr (d) 2250mg q8h IF 4hr


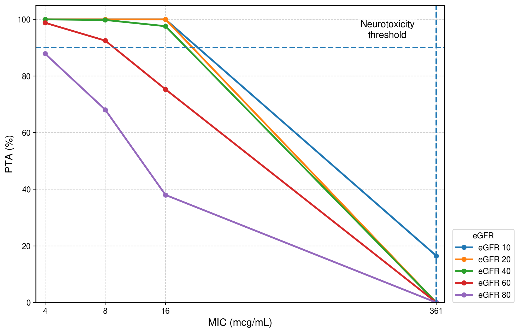

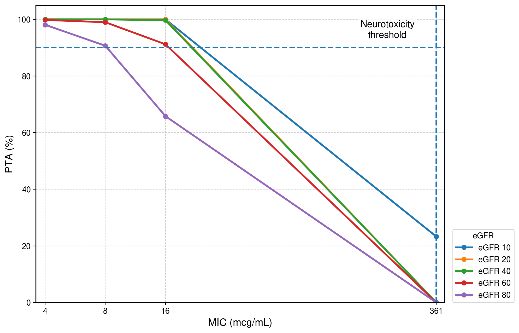


(e) 2250mg q6h IF 1hr (f) 2250mg q6h IF 4hr


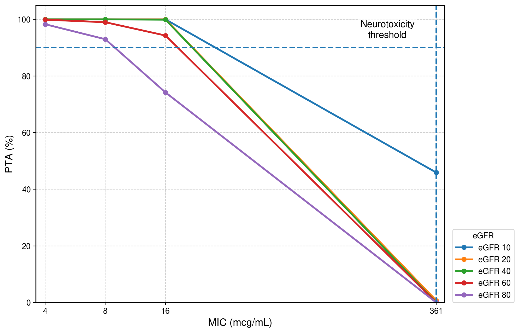

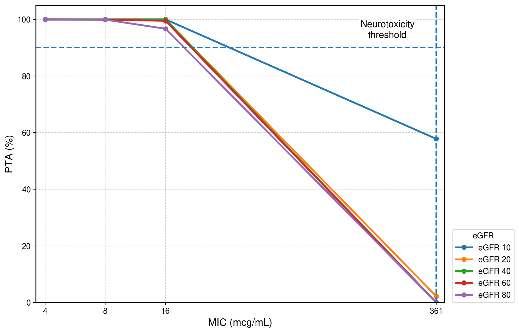


(g) 3375mg q6h IF 1hr (h) 3375mg q6h IF 4hr


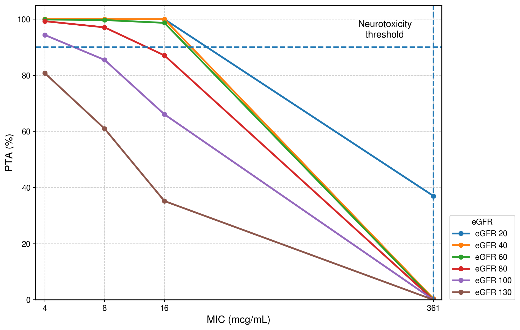

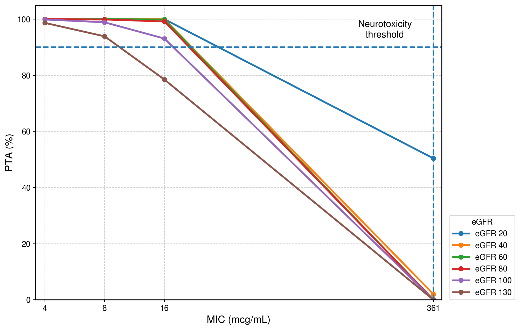


(i) 4500mg q6h IF 1hr (j) 4500mg q6h IF 4hr


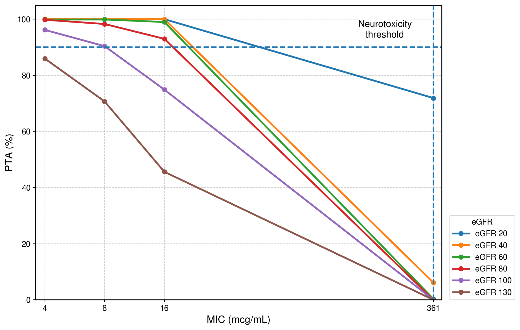

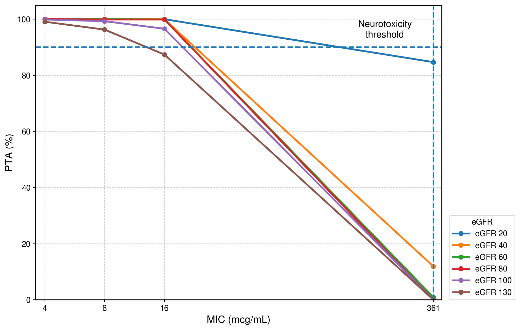


Supplementary Figure 3: Probability of target attainment (50% fT > MIC and 100% fT>4×MIC) at different MIC values and neurotoxicity risk for piperacillin under different dosing regimens and renal function strata.

* >10% probability of trough concentrations exceeding 361 mcg/mL

1. 50% fT > MIC


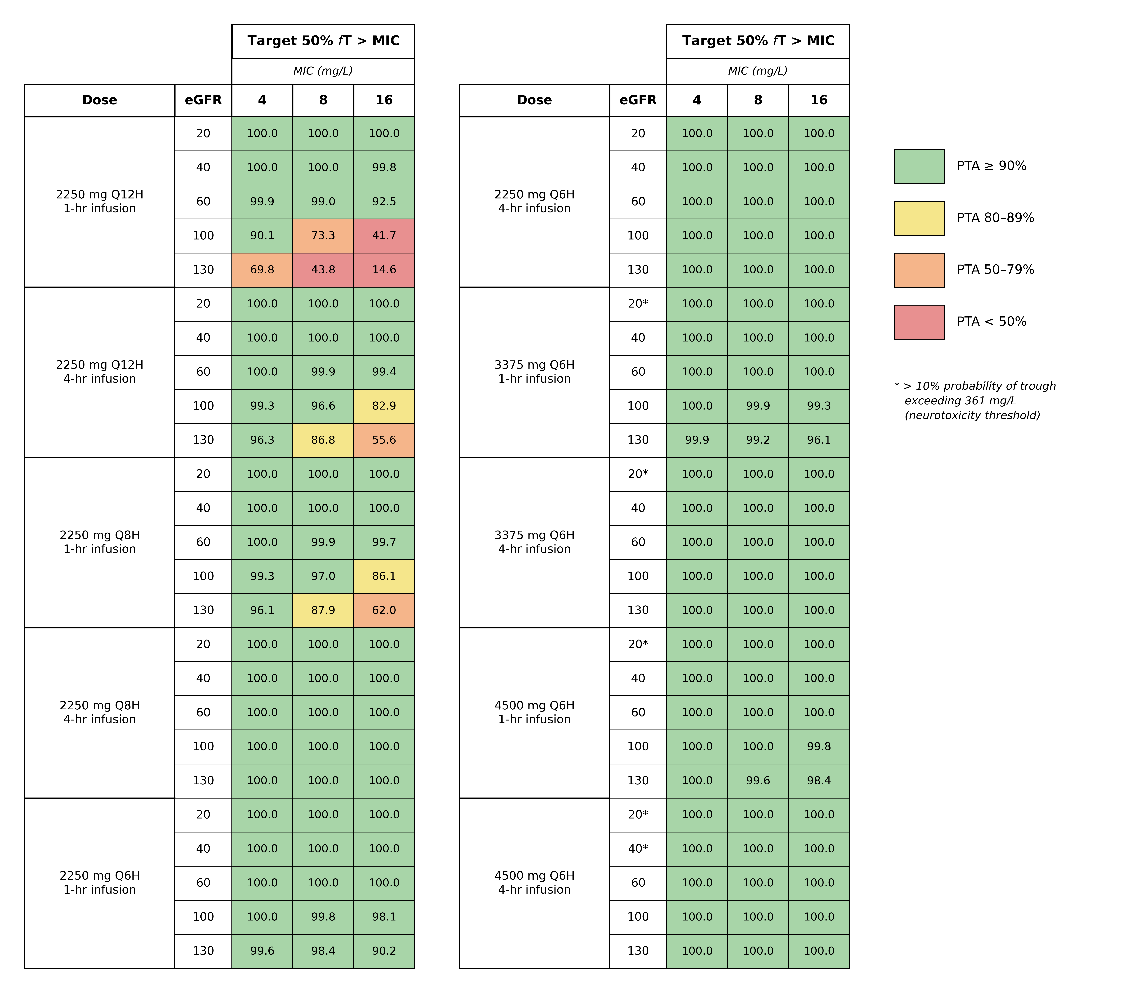


1. 100% fT>4×MIC


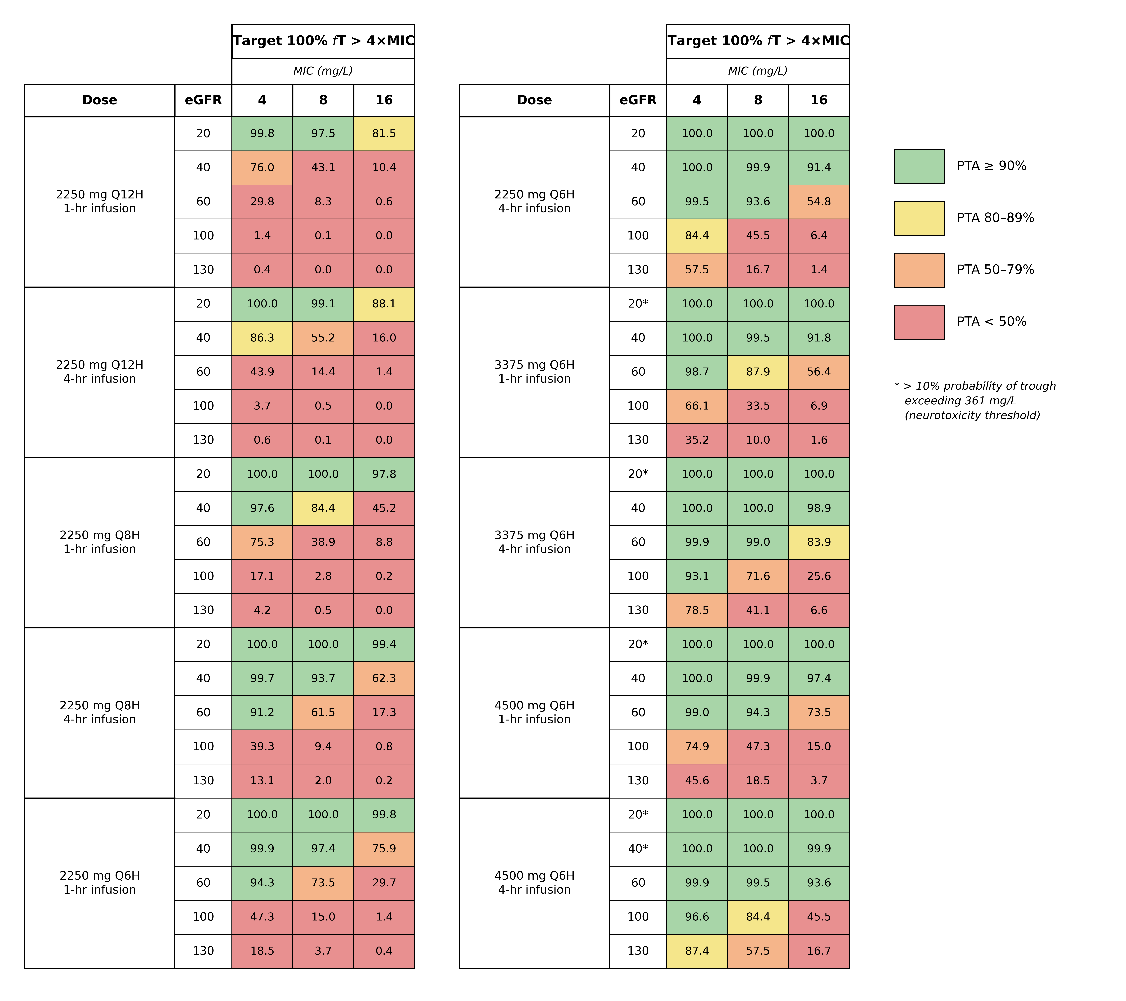

Supplement: Supplementary file 1 [file Supplementary%20table%20and%20figure.docx]
